# Supplementary material for: Human fetal whole-body postmortem microfocus computed tomographic imaging
Source: Springer Nature journal article supplement (doi:10.1038/s41596-021-00512-6), 2021-04-14
Supplement: MOESM1 [file 41596_2021_512_MOESM1_ESM23.pdf]

---

## Supplementary information

---

# Human fetal whole-body postmortem microfocus computed tomographic imaging

---

In the format provided by the  
authors and unedited

## Supplementary Manual

While the following is a general guide to the safe use of chemicals used within this protocol, safety data sheets accompany all hazardous reagents (and are required by European REACH regulations). It is the responsibility of the handler to adhere to safe laboratory practices and all local laws/guidelines.

### Formaldehyde 40%

**! Caution**

**FIRE HAZARD:** Flammable liquid and vapour

**INDIRECT EXPLOSION HAZARD:** Reacts violently with many compounds e.g.: with (strong) oxidizers: (increased) risk of fire/explosion. Reacts with (some) acids: release of (highly) toxic compounds.

#### **Dangers:**

Harmful if swallowed

Causes severe skin burns and eye damage

May cause an allergic skin reaction

Toxic if inhaled

May cause cancer (Inhalation)

Causes damage to organs (central nervous system, optic nerve, respiratory system)

Toxic to aquatic life

**Storage conditions :** Keep only in the original container in a cool, well ventilated place away from all incompatible products : Strong oxidizers, strong bases, metals, acid chlorides, acid anhydrides and strong acids.

Keep container closed when not in use.

Incompatible materials : Sources of ignition. Direct sunlight.

Storage temperature : < 55 °C

**Precautions:**

Wear protective gloves, protective clothing, eye protection, face protection

Use only in a cool, well ventilated area away from direct sunlight

Store locked up and dispose of contents/container to comply with local regulations.

Collect spillage into an absorbent material, e.g.: dry sand/earth/vermiculite. Scoop absorbed substance into closing containers and carefully collect the spill/leftovers, taking the collected spill to manufacturer/competent authority. Damaged/cooled tanks must be emptied. Clean contaminated surfaces with an excess of water.

Wash clothing and equipment after handling.

## Reagents for Potassium tri-iodide

### Iodine

#### ! Caution

Toxic in contact with skin and will cause skin burns and eye damage or may cause an allergic skin reaction.

Harmful if inhaled and very toxic to aquatic life

**Storage conditions:** Keep only in the original container in a cool, well ventilated place away from all incompatible products : Strong bases, ammonia, strong oxidizers, acetaldehyde and away from sources of ignition such as direct sunlight. Keep container closed when not in use.

#### Precautions:

Wear protective gloves, protective clothing, eye protection, face protection

Collect spillage

Store locked up

Dispose of contents/container to comply with local regulations

### Potassium iodide

#### ! Caution

Toxic to aquatic life

**Storage conditions :** Keep container closed when not in use and away from all incompatible products: Metals, strong reducing agents as well as heat sources, direct sunlight and moisture.

**Precautions:**

Wear protective gloves

Avoid release to the environment.

Store locked up

Dispose of contents/container to comply with local, state and federal regulations
